# Supplementary material for: A guanosine-based 2-formylphenylborate ester hydrogel with high selectivity to K+ ions
Source: Royal Society of Chemistry journal article supplement (doi:10.1039/d0ra05254j), 2020-01-01
Supplement: d0ra05254j1.pdf [file d0ra05254j1.pdf]

Electronic Supplementary Material (ESI)  
This journal is © The Royal Society of Chemistry 2020

## A guanosine-based 2-formylphenylborate ester hydrogel with high selectivity to K<sup>+</sup> ions

Hongwei Qiao, <sup>†a</sup> Jiakun Bai, <sup>†b</sup> Sichun Zhang <sup>a</sup> and Chao Li, <sup>\*b</sup>

<sup>a</sup> Department of Chemistry, Tsinghua University, Beijing 100084, P. R. China

<sup>b</sup> State Key Laboratory of Chemical Resource Engineering, Beijing University of Chemical Technology, Beijing 100029, P. R. China

<sup>†</sup>H. W. Qiao and J. K. Bai contributed equally to this work.

### Contents

|                                                                                                                                                  |    |
|--------------------------------------------------------------------------------------------------------------------------------------------------|----|
| General procedure for <b>G-2FPB-K<sup>+</sup></b> hydrogel preparation.....                                                                      | S2 |
| Rheology Procedure.....                                                                                                                          | S2 |
| Morphological Assay.....                                                                                                                         | S2 |
| Powder X-ray Diffraction (PXRD) Assay.....                                                                                                       | S2 |
| Circular Dichroism (CD) Assay.....                                                                                                               | S2 |
| FTIR Spectroscopy Assay.....                                                                                                                     | S2 |
| VT <sup>1</sup> H NMR and VT <sup>11</sup> B NMR Assay of Diluted <b>G-2FPB-K<sup>+</sup></b> Assembly Solution.....                             | S2 |
| Procedure for Diffusion-Ordered Spectroscopy Measurements.....                                                                                   | S3 |
| Fluorescence assay.....                                                                                                                          | S3 |
| UV-Vis assay.....                                                                                                                                | S3 |
| <b>Fig. S1.</b> The CD spectra of <b>G-2FPB-M<sup>+</sup></b> solution with various concentration.....                                           | S4 |
| <b>Fig. S2.</b> FTIR spectra of <b>G-2FPB-Na<sup>+</sup></b> and <b>G-2FPB-K<sup>+</sup></b> .....                                               | S4 |
| <b>Fig. S3.</b> <sup>1</sup> H NMR spectra of <b>G-2FPB-K<sup>+</sup></b> hydrogel and 2-formylphenylboronic acid.....                           | S5 |
| <b>Fig. S4.</b> DOSY spectrum of <b>G-2FPB-K<sup>+</sup></b> hydrogel.....                                                                       | S5 |
| <b>Fig. S5.</b> The contents of guanosine 2-formylphenylborate ester <b>3</b> in 50 mM <b>G-2FPB-M<sup>+</sup></b> at different temperature..... | S6 |
| <b>Fig. S6.</b> UV-Vis spectra of the <b>G-2FPB-K<sup>+</sup></b> hydrogel with different concentration of berberine .....                       | S6 |
| <b>Fig. S7.</b> The fluorescence spectra of <b>G-2FPB-Na<sup>+</sup></b> /BBR anti-ion interference assays.....                                  | S7 |
| <b>Fig. S8.</b> The ISE reports of the China-Japan Friendship Hospital.....                                                                      | S7 |

## General procedure for G-2FPB-K<sup>+</sup> hydrogel preparation

283.0 mg of guanosine (**1**, 1.0 mmol, 1 equiv) and 150.0 mg of 2-formylphenylboronic acid (**2**, 1.0 mmol, 1 equiv) was added to a 50 mL round bottom flask. Then 56.0 mg of KOH solids (1.0 mmol, 1 equiv) and 20 mL of ultrapure water were added. The suspension was stirred and heated to 95 °C in an oil bath until all the substances were dissolved and the solution became clear. When the solution was cooled to room temperature, a transparent and stable supramolecular **G-2FPB-K<sup>+</sup>** hydrogel (50 mM) was formed. The **G-2FPB-M<sup>+</sup>** solution with other alkali metal ions (Li<sup>+</sup>, Na<sup>+</sup>, Rb<sup>+</sup>, and Cs<sup>+</sup>) were prepared similarly.

## Rheology Procedure

Gels were prepared at 50 mM **G-2FPB-K<sup>+</sup>**, following the general gel procedure. All rheological data was collected using an AR2000ex stress-controlled rheometer from TA instruments. Rheological experiments were performed at 20 °C using parallel plate geometry (40 mm diameter) and a solvent trap to minimize sample drying during measurements. The gel samples were allowed to equilibrate on the plate for 10 min. Frequency sweeps were performed at 1% strain. Stress sweeps were performed at 10 rad/sec by ramping the stress from 0.5 to 1000 Pa.

## Morphological Assay

Transmission electron microscopy (TEM) images were obtained on a JEM 1200EX, operating at accelerating voltages of 100 kV. Ten  $\mu$ L of a freshly prepared solution of **G-2FPB-K<sup>+</sup>** assembly (5 mM or 10 mM) was cast onto carbon-coated copper grids (300 mesh) for 3 min. The sample was dried under an ambient temperature.

Atomic force microscopy (AFM) images were performed on freshly cleaved fluorophlogopite mica (1 cm  $\times$  1 cm). A total of 5  $\mu$ L of the freshly prepared solution of the **G-2FPB-K<sup>+</sup>** assembly (5 mM) was spincoated for 30 s, and the mica was briefly dried under a stream of N<sub>2</sub> (g). AFM imaging was performed with a Nanoscope IIIa (Digital Instruments) in tapping mode in air, using Si tips. The probes were commercially available silicon tips with a spring constant of 42 N·m<sup>-1</sup>.

## Powder X-ray Diffraction (PXRD) Assay

A 50 mM **G-2FPB-K<sup>+</sup>** hydrogel was prepared and lyophilized to form a white powder. X-ray powder diffraction measurements were performed with a Cu radiation source at 20 °C using a LabX PXRD-6000 with a LynxEye detector.

## Circular Dichroism (CD) Assay

All experiments were performed with a Jasco J-815 spectropolarimeter. CD spectroscopy of various assemblies solution was measured with a 0.01 mm cell. Three scans were accumulated and averaged by the computer. All experiments were carried out at 25 °C. A hot **G-2FPB-M<sup>+</sup>** solution with various concentration was added in cell. The samples were used directly to test when they cooled down to room temperature.

## FTIR Spectroscopy Assay

FTIR spectra were recorded on a Nicolet FTIR spectrometer (Nicolet iS5, USA). A 50 mM **G-2FPB-M<sup>+</sup>** system was lyophilized and mixed with dry potassium bromide (KBr). The spectra were recorded from 400 to 4000 cm<sup>-1</sup>.

## VT <sup>1</sup>H NMR and VT <sup>11</sup>B NMR Assay of Diluted G-2FPB-K<sup>+</sup> Assembly Solution

All VT NMR spectra of **G-2FPB-K<sup>+</sup>** hydrogel were recorded on a Bruker AV-400 nuclear magnetic resonance spectroscope in D<sub>2</sub>O and the temperature was controlled from 5 to 85°C. BF<sub>3</sub>·O(C<sub>2</sub>H<sub>5</sub>)<sub>2</sub> was used as an external standard for VT <sup>11</sup>B NMR and 2,2,3,3-(d<sub>4</sub>)-3-(trimethylsilyl) propionic acid sodium salt (0.31 mM) was used as an

internal standard for VT  $^1\text{H}$  NMR. A total of 600  $\mu\text{L}$  of the 50 mM **G-2FPB-K<sup>+</sup>** hydrogel containing an internal standard or external standard was added to the NMR sample tube as the sample of VT  $^1\text{H}$  NMR or VT  $^{11}\text{B}$  NMR.

## Procedure for Diffusion-Ordered Spectroscopy Measurements

A 50 mM **G-2FPB-Na<sup>+</sup>** solution (**1**, **2**, and NaOH 50 mM each) was prepared in  $\text{D}_2\text{O}$  according to the general preparation procedure. The warm gel (600  $\mu\text{L}$ ) was then transferred into a NMR tube, and the gel was allowed to cool overnight. Diffusion experiments were performed on a Bruker AVIII-600, using a Stimulated Echo Pulse Gradient sequence in FT mode. Experiments consisted of 32 points at 100 scans with a delay of 5 s, a gradient pulse length of 1.65 ms, and  $\Delta$  value of 60.0 ms. The temperature was controlled at 25.0  $^\circ\text{C}$ , and the measurements were repeated at least 3 times.

## Fluorescence assay

Fluorescence Spectra were recorded on HITACHI F-7000 Fluorescence spectrophotometer. Standard quartz cuvettes with a 1 cm light path were used for all fluorescent spectra measurements. All the fluorescent experiments were repeated three times and were carried out at 25  $^\circ\text{C}$ . Other parameter: excitation wavelength: 371 nm; emission wavelength: 523 nm; EX Slit: 5.0 nm; EM Slit: 5.0 nm; PMT Voltage: 400 V

## UV-Vis assay

A 5  $\mu\text{L}$  (or 10  $\mu\text{L}$ ) of solution of berberine hydrochloride (3.1 mM) was added in a 1 mL of **G-2FPB-K<sup>+</sup>** thermal solution (50 mM), and then cooled room temperature. UV-vis titration spectra were recorded on HITACHI UH5300 spectrophotometer. A path length cell of 0.01 mm was used and all experiments were performed at room temperature.

## G-2FPB-Na<sup>+</sup>/BBR anti-ion interference assay

A total of 2000  $\mu\text{L}$  of the 100 mM **G-2FPB-Na<sup>+</sup>** PB buffer solution (pH=7.4) containing 3.1 mM berberine was added to the standard quartz cuvettes. 20  $\mu\text{L}$  of the corresponding  $\text{M}^{n+}$  solutions (20 mM, 200 mM or 2000 mM) were added to obtain a fluorescence spectra. Then 20  $\mu\text{L}$  of 20 mM KCl solution was added to obtain another fluorescence spectra. See Figure S3 for details.

## The detection assays of human blood serum samples

A total of 1800  $\mu\text{L}$  of the 111 mM **G-2FPB-Na<sup>+</sup>** PB buffer solution (pH=7.4) containing 3.44 mM berberine was added to the standard quartz cuvettes. 200  $\mu\text{L}$  of the corresponding blood serum samples were added to obtain a fluorescence spectra.

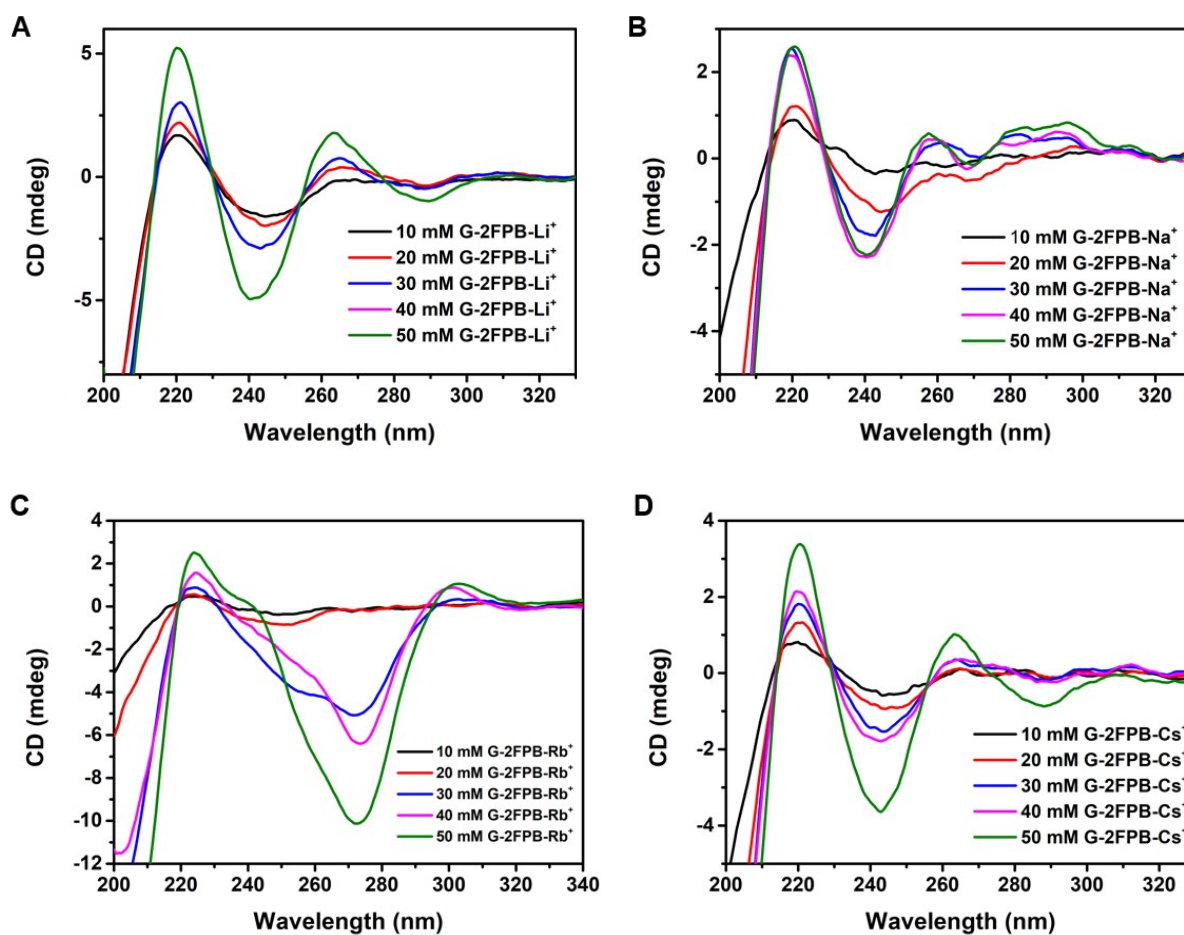

**Fig. S1.** The CD spectra of **G-2FPB-M<sup>+</sup>** solution with various concentration. (A) Li<sup>+</sup>, (B) Na<sup>+</sup>, (C) Rb<sup>+</sup>, (D) Cs<sup>+</sup>. (guanosine 1.0 equiv, 2-formylphenylboronic acid 1.0 equiv, LiOH, NaOH, RbOH or CsOH 1.0 equiv)

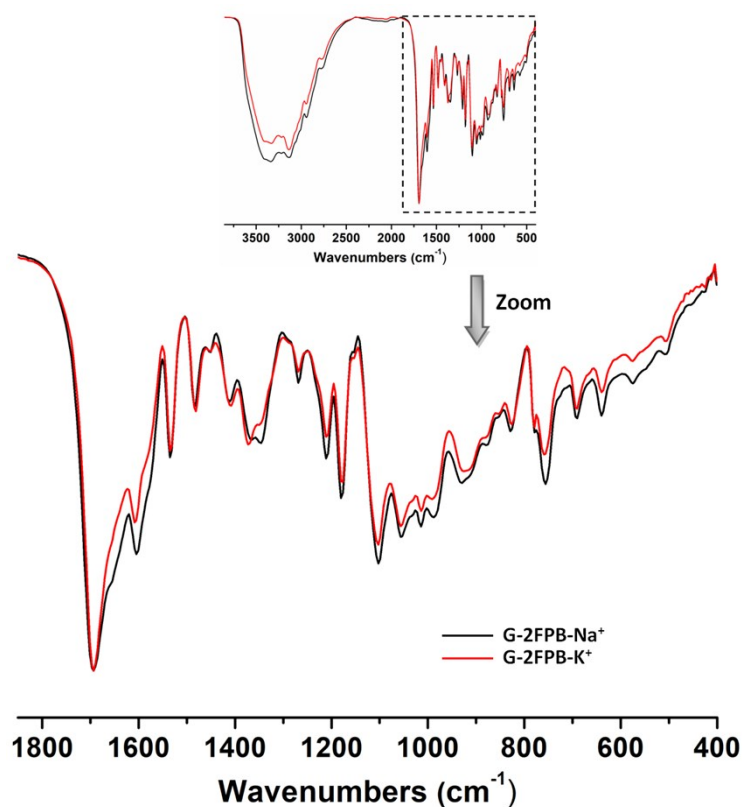

**Fig. S2.** FTIR spectra of **G-2FPB-Na<sup>+</sup>** (black line) and **G-2FPB-K<sup>+</sup>** (red line).

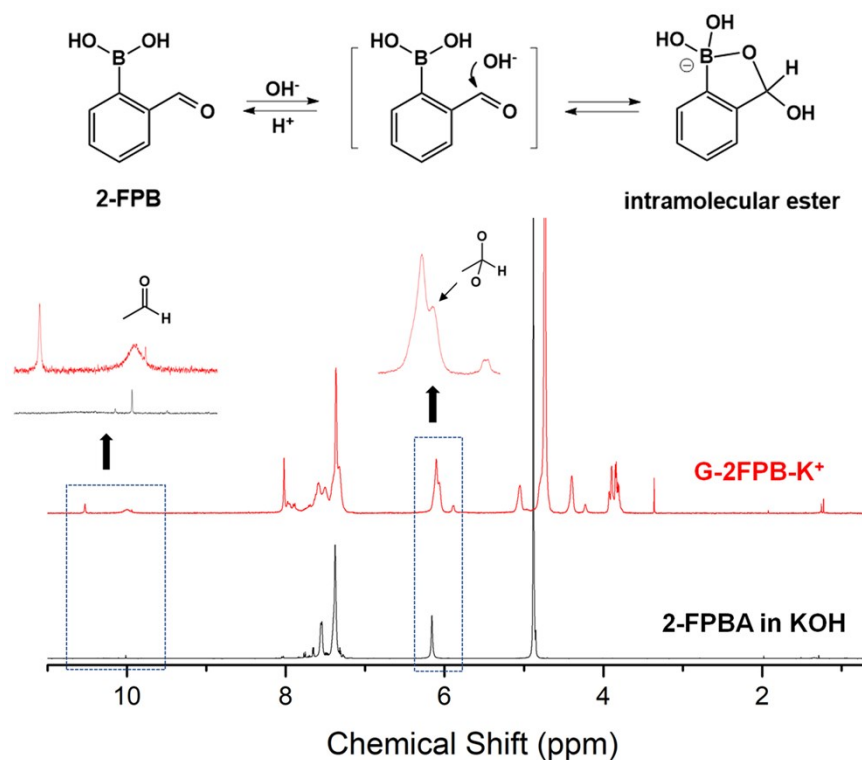

**Fig. S3.**  $^1\text{H}$  NMR spectra of a 50 mM **G-2FPB- $\text{K}^+$**  hydrogel and 2-formylphenylboronic acid in KOH at 25  $^\circ\text{C}$ .

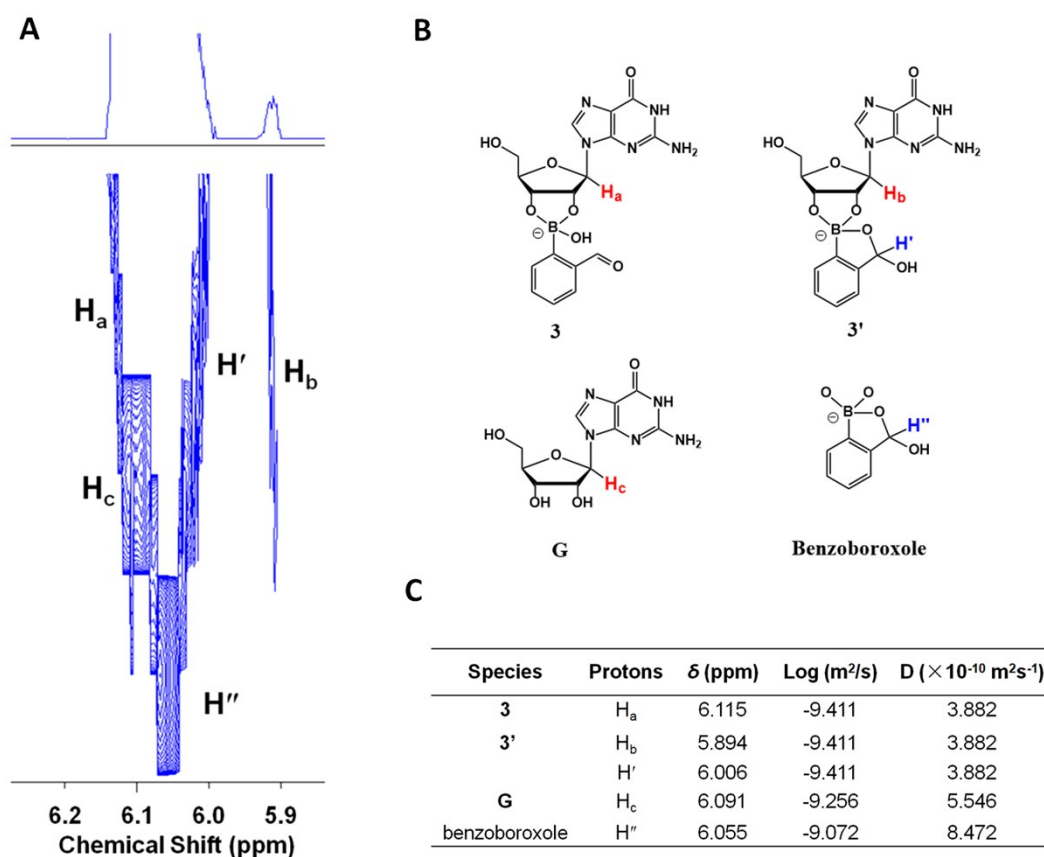

**Fig. S4.** (A) DOSY spectrum of a 50 mM **G-2FPB- $\text{K}^+$**  hydrogel at 25  $^\circ\text{C}$ . (B) The possible visible species in hydrogel. (C) The diffusion coefficients of various species.

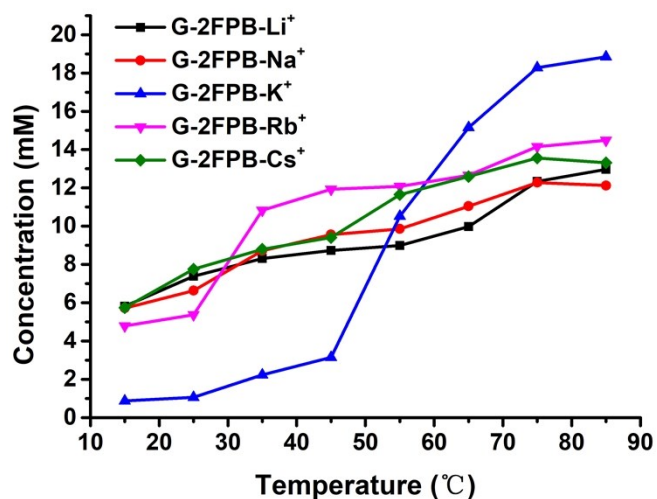

**Fig. S5.** The contents of guanosine 2-formylphenylborate ester **3** in 50 mM **G-2FPB-M<sup>+</sup>** (Li<sup>+</sup>, Na<sup>+</sup>, K<sup>+</sup>, Rb<sup>+</sup>, and Cs<sup>+</sup>) at different temperature.

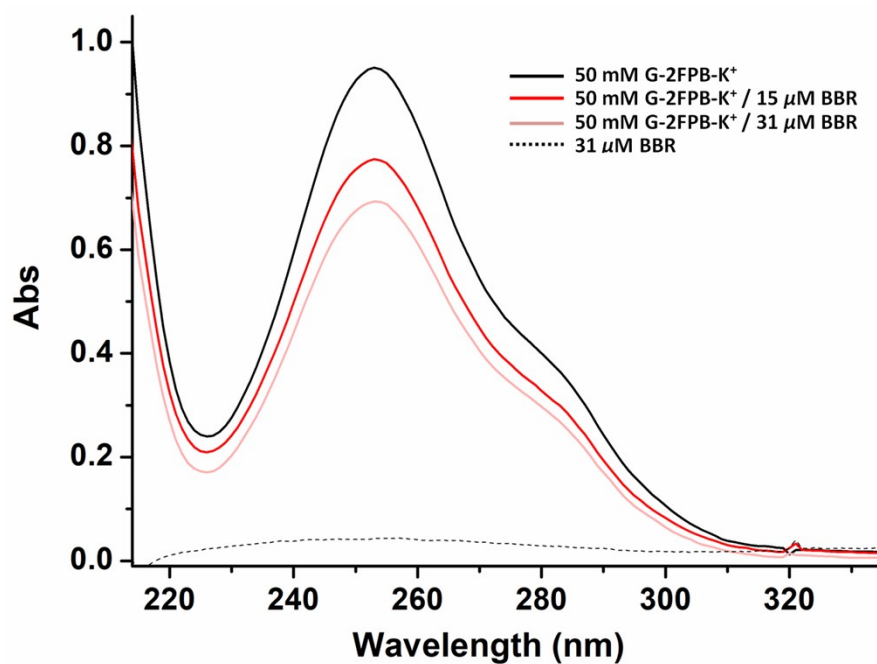

**Fig. S6.** UV-Vis spectra of the **G-2FPB-K<sup>+</sup>** hydrogel with different concentration of berberine at 25 °C.

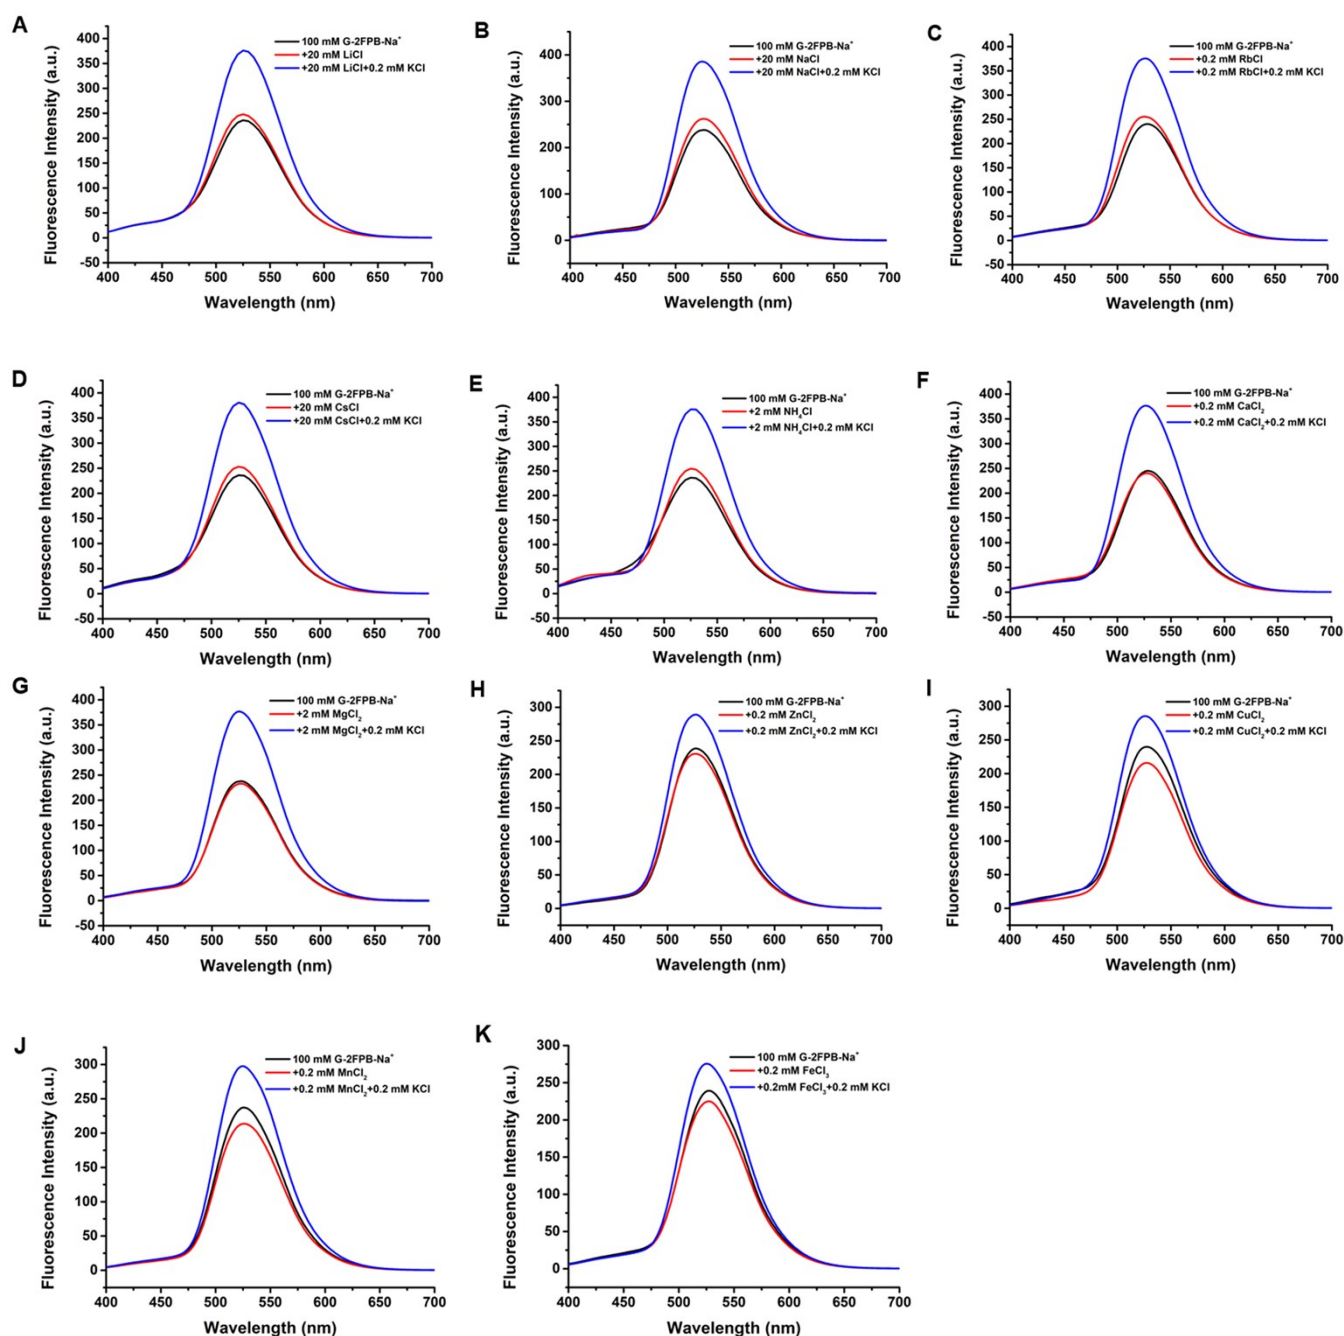

**Fig. S7.** The fluorescence spectra of **G-2FPB-Na<sup>+</sup>**/BBR anti-ion interference assays. (A) 100 equiv Li<sup>+</sup> ; (B) 100 equiv Na<sup>+</sup> ; (C) 1 equiv Rb<sup>+</sup> ; (D) 100 equiv Cs<sup>+</sup> ; (E) 10 equiv NH<sub>4</sub><sup>+</sup> ; (F) 1 equiv Ca<sup>2+</sup> ; (G) 10 equiv Mg<sup>2+</sup> ; (H) 1 equiv Zn<sup>2+</sup> ; (I) 1 equiv Cu<sup>2+</sup> ; (J) 1 equiv Mn<sup>2+</sup> ; (K) 1 equiv Fe<sup>3+</sup>.



A

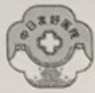

中日友好医院

clinical test report  
临床检验结果报告单

LABORATORY REPORT OF CHINA-JAPAN FRIENDSHIP HOSPITAL, MINISTRY OF HEALTH, CHINA

|            |          |            |                    |        |           |                      |                    |    |
|------------|----------|------------|--------------------|--------|-----------|----------------------|--------------------|----|
| 姓 名        | 样本类型     | 血清         | serum              | 诊 断    | 急诊科       | emergency department | 病案号                |    |
| 年 龄 62岁    | 采样时间     | 2019-06-25 | 04:05              | 科 别    | 急诊科       | emergency department | 样本号                | 68 |
| 性 别 男 male | 接收时间     | 2019-06-25 | 06:10              | 卡 号    |           |                      | 申请医师               |    |
| item       | name     | value      | range              | item   | name      | value                | range              |    |
| Cysc       | 血清肌酐测定   | 1.08       | ↑ mg/L 0.50-1.03   | Urea   | *尿素       | 3.16                 | mmol/L 2.78-7.85   |    |
| CR         | *肌酐(酶法)  | 44.1       | μ mol/L 35-106     | UA     | *尿酸       | 310                  | μ mol/L 150-420    |    |
| GLU        | *糖       | 7.26       | ↑ mmol/L 3.61-6.11 | GA     | 糖化白蛋白     | 17.4                 | ↑ % 11.0-16.0      |    |
| CO2        | 二氧化碳     | 28.9       | mmol/L 21-35       | Clq    | Clq循环复合物  | 197                  | mg/L 159-233       |    |
| K          | *钾       | 3.4        | ↓ mmol/L 3.5-5.5   | Na     | *钠        | 134                  | ↓ mmol/L 135-145   |    |
| CL         | *氯       | 97         | mmol/L 90-110      | Ca     | *总钙       | 1.94                 | ↓ mmol/L 2.00-2.75 |    |
| IP         | *无机磷     | 1.12       | mmol/L 0.81-1.78   | β 2-MC | 血 β 2微球蛋白 | 1.98                 | mg/L 1-3           |    |
| eGFR       | 估算肾小球滤过率 | 116.41     | ml/min/1.73m² 仅供参考 |        |           |                      |                    |    |

备注:

检验时间 2019-06-25 07:07 检验者 审核者 报告时间 2019-06-25 07:13  
此报告仅对送检样本负责, 结果供医师参考。

B

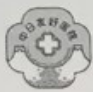

中日友好医院

clinical test report  
临床检验结果报告单

LABORATORY REPORT OF CHINA-JAPAN FRIENDSHIP HOSPITAL, MINISTRY OF HEALTH, CHINA

|        |              |        |                    |        |                      |       |                    |
|--------|--------------|--------|--------------------|--------|----------------------|-------|--------------------|
| 姓 名    | 样本类型         | 血清     | serum              | 诊 断    | 病案号                  |       |                    |
| 年 龄    | 70岁          | 采样时间   | 2019-06-25 04:10   | 科 别    | 急诊科                  |       |                    |
| 性 别    | 女            | 接收时间   | 2019-06-25 06:09   | 卡 号    | emergency department |       |                    |
|        |              |        |                    |        | 样本号 62               |       |                    |
|        |              |        |                    |        | 申请医师                 |       |                    |
| item   | name         | value  | range              | item   | name                 | value | range              |
| ALT    | *丙氨酸氨基转移酶    | 11     | IU/L 0-40          | AST    | *天冬氨酸氨基转移酶           | 13    | IU/L 0-42          |
| TBIL   | *总胆红素        | 9.69   | μ mol/L 5.00-21.00 | DBIL   | 直接胆红素                | 4.27  | μ mol/L 0.00-7.00  |
| TP     | *总蛋白定量       | 51.7   | ↓ g/L 60.0-80.0    | ALB    | *白蛋白定量               | 26.1  | ↓ g/L 35.0-55.0    |
| A/G    | A/G          | 1.02   | 1-2.5              | Pre-A1 | 前白蛋白                 | 30.71 | ↓ mg/L 200-400     |
| GGT    | *γ -谷氨酰转肽酶   | 24     | IU/L 0-52          | ALP    | *碱性磷酸酶               | 79    | IU/L 40-150        |
| TBA    | 血清总胆汁酸       | 1.1    | μ mol/L 0-10       | CG     | 甘氨酸                  | <0.1  | mg/L <2.7          |
| MAO    | 单氨氧化酶        | 9.20   | U/L <12            | AFU    | 血清 α -L-岩藻糖苷酶        | 18    | U/L 5-40           |
| ADA    | 腺苷脱氨酶        | 9      | U/L 4-24           | LAP    | 亮氨酸氨基肽酶测定            | 38    | U/L 38-75          |
| CHE    | 胆碱酯酶         | 4855.8 | ↓ U/L 5400-13200   | TSA    | 血清唾液酸                | 99    | ↑ mg/dl 44-75      |
| SOD    | 血清Cu\Zn超氧化物歧 | 82.00  | ↓ U/ml 129-216     | Cysc   | 血清胱抑素测定              | 1.24  | ↑ mg/L 0.50-1.03   |
| Urea   | *尿素          | 3.14   | mmol/L 2.78-7.85   | CR     | *肌酐(酶法)              | 68.5  | μ mol/L 35-106     |
| UA     | *尿酸          | 106    | ↓ μ mol/L 150-420  | GLU    | *糖                   | 14.65 | ↑ mmol/L 3.61-6.11 |
| GA     | 糖化白蛋白        | 35.9   | ↑ % 11.0-16.0      | CO2    | 二氧化碳                 | 26.0  | mmol/L 21-35       |
| Clq    | Clq循环复合物     | 211    | mg/L 159-233       | K      | *钾                   | 3.8   | mmol/L 3.5-5.5     |
| Na     | *钠           | 134    | ↓ mmol/L 135-145   | CL     | *氯                   | 100   | mmol/L 90-110      |
| Ca     | *总钙          | 1.93   | ↓ mmol/L 2.00-2.75 | IP     | *无机磷                 | 0.86  | mmol/L 0.81-1.78   |
| β 2-MG | 血 β 2微球蛋白    | 3.41   | ↑ mg/L 1-3         | eGFR   | 估算肾小球滤过率             | 77.95 | ml/min/1.73m² 仅供参考 |

备注:

检验时间 2019-06-25 07:01 检验者 审核者 报告时间 2019-06-25 07:10  
此报告仅对送检样本负责, 结果供医师参考。



C

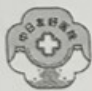

中日友好医院

clinical test report

临床检验结果报告单

LABORATORY REPORT OF CHINA-JAPAN FRIENDSHIP HOSPITAL, MINISTRY OF HEALTH, CHINA

姓名 样本类型 血清 **serum** 诊断 **emergency department** 病案号  
 年龄 69岁 采样时间 2019-06-24 22:57 科别 急诊科 样本号 67  
 性别 男 **male** 接收时间 2019-06-25 06:07 卡号 申请医师

| item | name           | value  | range             | item   | name        | value | range                          |
|------|----------------|--------|-------------------|--------|-------------|-------|--------------------------------|
| ALT  | *丙氨酸氨基转移酶      | 28     | IU/L 0-40         | AST    | *天冬氨酸氨基转移酶  | 20    | IU/L 0-42                      |
| TBIL | *总胆红素          | 10.81  | μmol/L 5.00-21.00 | DBIL   | 直接胆红素       | 6.71  | μmol/L 0.00-7.00               |
| TP   | *总蛋白定量         | 63.6   | g/L 60.0-80.0     | ALB    | *白蛋白定量      | 26.1  | g/L 35.0-55.0                  |
| A/G  | A/G            | 0.70   | ↓ 1-2.5           | Pre-A1 | 前白蛋白        | 46.40 | ↓ mg/L 200-400                 |
| GGT  | *γ-谷氨酰转肽酶      | 170    | ↑ IU/L 0-52       | ALP    | *碱性磷酸酶      | 150   | IU/L 40-150                    |
| TBA  | 血清总胆汁酸         | 1.8    | μmol/L 0-10       | CG     | 甘胆酸         | 0.1   | mg/L <2.7                      |
| MAO  | 单氨氧化酶          | 7.51   | U/L <12           | AFU    | 血清α-L-岩藻糖苷酶 | 27    | U/L 5-40                       |
| ADA  | 腺苷脱氨酶          | 9      | U/L 4-24          | LAP    | 亮氨酸氨基肽酶测定   | 57    | U/L 38-75                      |
| CHE  | 胆碱酯酶           | 2294.8 | ↓ U/L 5400-13200  | TSA    | 血清唾液酸       | 120   | ↑ mg/dl 44-75                  |
| SOD  | 血清Cu/Zn超氧化物歧化酶 | 113.00 | ↓ U/ml 129-216    | Urea   | *尿素         | 5.20  | mmol/L 2.78-7.85               |
| CR   | *肌酐(酶法)        | 61.9   | μmol/L 35-106     | UA     | *尿酸         | 243   | μmol/L 150-420                 |
| GLU  | *糖             | 5.38   | mmol/L 3.61-6.11  | CO2    | 二氧化碳        | 20.7  | ↓ mmol/L 21-35                 |
| K    | *钾             | 4.2    | mmol/L 3.5-5.5    | Na     | *钠          | 139   | mmol/L 135-145                 |
| CL   | *氯             | 102    | mmol/L 90-110     | Ca     | *总钙         | 2.05  | mmol/L 2.00-2.75               |
| IP   | *无机磷           | 1.23   | mmol/L 0.81-1.78  | eGFR   | 估算肾小球滤过率    | 96.41 | ml/min/1.73m <sup>2</sup> 仅供参考 |

备注:

检验时间 2019-06-25 07:07 检验者 审核者 报告时间 2019-06-25 07:13  
 此报告仅对送检样本负责, 结果供医师参考。

D

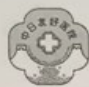

中日友好医院

clinical test report

临床检验结果报告单

LABORATORY REPORT OF CHINA-JAPAN FRIENDSHIP HOSPITAL, MINISTRY OF HEALTH, CHINA

姓名 样本类型 血清 **serum** 诊断 **emergency department** 病案号  
 年龄 90岁 采样时间 2019-06-25 04:12 科别 急诊科 样本号 65  
 性别 女 **female** 接收时间 2019-06-25 06:07 卡号 申请医师

| item | name      | value | range                          | item  | name        | value | range              |
|------|-----------|-------|--------------------------------|-------|-------------|-------|--------------------|
| ALT  | *丙氨酸氨基转移酶 | 5     | IU/L 0-40                      | AST   | *天冬氨酸氨基转移酶  | 14    | IU/L 0-42          |
| TBIL | *总胆红素     | 9.85  | μmol/L 5.00-21.00              | DBIL  | 直接胆红素       | 3.29  | μmol/L 0.00-7.00   |
| GGT  | *γ-谷氨酰转肽酶 | 12    | IU/L 0-52                      | ALP   | *碱性磷酸酶      | 36    | ↓ IU/L 40-150      |
| TBA  | 血清总胆汁酸    | 3.8   | μmol/L 0-10                    | CG    | 甘胆酸         | 0.1   | mg/L <2.7          |
| MAO  | 单氨氧化酶     | 5.18  | U/L <12                        | AFU   | 血清α-L-岩藻糖苷酶 | 15    | U/L 5-40           |
| ADA  | 腺苷脱氨酶     | 6     | U/L 4-24                       | LAP   | 亮氨酸氨基肽酶测定   | 27    | ↓ U/L 38-75        |
| Cysc | 血清胱抑素测定   | 3.02  | ↑ mg/L 0.50-1.03               | Urea  | *尿素         | 8.99  | ↑ mmol/L 2.78-7.85 |
| CR   | *肌酐(酶法)   | 123.4 | ↑ μmol/L 35-106                | UA    | *尿酸         | 416   | μmol/L 150-420     |
| GLU  | *糖        | 4.53  | mmol/L 3.61-6.11               | GA    | 糖化白蛋白       | 11.1  | % 11.0-16.0        |
| CO2  | 二氧化碳      | 42.1  | ↑ mmol/L 21-35                 | Clq   | Clq循环复合物    | 149   | ↓ mg/L 159-233     |
| K    | *钾        | 4.6   | mmol/L 3.5-5.5                 | Na    | *钠          | 144   | mmol/L 135-145     |
| CL   | *氯        | 99    | mmol/L 90-110                  | Ca    | *总钙         | 2.04  | mmol/L 2.00-2.75   |
| IP   | *无机磷      | 0.93  | mmol/L 0.81-1.78               | β2-MG | 血β2微球蛋白     | 8.94  | ↑ mg/L 1-3         |
| eGFR | 估算肾小球滤过率  | 33.25 | ml/min/1.73m <sup>2</sup> 仅供参考 |       |             |       |                    |

备注:

检验时间 2019-06-25 07:04 检验者 审核者 报告时间 2019-06-25 07:10  
 此报告仅对送检样本负责, 结果供医师参考。
